# Supplementary material for: Predictive modeling of hourly probabilities for weather-related road accidents
Source: Copernicus journal article supplement (doi:10.5194/nhess-20-2857-2020), 2020-10-29
Supplement: Supplementary file 1 [file nhess-20-2857-2020-supplement.zip]

Archive with 6 entries (6 files):
- nhess-20-2857-2020-supplement-title-page.pdf
- Description.pdf
- HOUR.csv
- RAD_INT.csv
- RAD.csv
- NULL.csv
