# Supplementary material for: Predictive modeling of hourly probabilities for weather-related road accidents
Source: Copernicus journal article supplement (doi:10.5194/nhess-20-2857-2020), 2020-10-29
Supplement: Supplementary file 1 [file nhess-20-2857-2020-supplement.zip › Description.pdf]

# Description of CSV files with model details

As described in Sect. 4.1 we provide the full model details of the four main models NULL, HOUR, RAD and RAD\_INT in comma-separated CSV format in the files NULL.csv, HOUR.csv, RAD.csv and RAD\_INT.csv. Each file contains a table with the model details of the respective model. The first row of the table shows the name of the model parameter corresponding to the variable definitions in Tab. 1 of the main article. The names of the 23 coefficients of the categorical variable H are labeled H1, H2, H3, etc. corresponding to the hour of the day. In case of interaction terms, the names of the interacting parameters are separated by a colon. The second, third and fourth row lists the corresponding estimates of the coefficients, their estimated standard errors and the ratio between coefficient and standard error, which is referred to as the z-value. A fifth column gives the p-values of a two-tailed z-test. The sixth column categorizes the p-values according to different significance levels as shown in Tab. S1.

**Table S1:** Markers and corresponding p-value ranges used to categorize significance levels in CSV files containing model details.

| Marker | p-value         |
|--------|-----------------|
| ***    | $< 0.001$       |
| **     | $[0.001, 0.01)$ |
| *      | $[0.01, 0.05)$  |
| .      | $[0.05, 0.1)$   |
|        | $\geq 0.1$      |
