# Supplementary material for: Predictive modeling of hourly probabilities for weather-related road accidents
Source: Copernicus journal article supplement (doi:10.5194/nhess-20-2857-2020), 2020-10-29
Supplement: Supplementary file 1 [file nhess-20-2857-2020-supplement.zip › HOUR.csv]

Parameter	Estimate	Std. Error	z value	Pr(>|z|)	Significance
Intercept	-0.747345666206159	0.023985297046119	-31.1584911693676	3.89203943633087e-213	***
H1	-0.214326522368492	0.0260652473744205	-8.2226928173651	1.98984027113192e-16	***
H2	-0.290433500681833	0.0266192372486331	-10.9106620136813	1.02507117229921e-27	***
H3	-0.232675526348816	0.0261902225862955	-8.88406066737925	6.4463106612651e-19	***
H4	0.0301924515232362	0.0244613147760123	1.23429389628901	0.217093409531571
H5	0.735152950631295	0.0212430797362556	34.6067029714439	2.00306216732782e-262	***
H6	1.11173751209248	0.0201527359710255	55.1655871287586	0	***
H7	1.4063529573142	0.0195177343181648	72.0551337767386	0	***
H8	1.14659178668167	0.0200675462250074	57.1366211805624	0	***
H9	0.978546356357109	0.0204999612046826	47.7340589373209	0	***
H10	0.798867584745462	0.0210360869571756	37.9760544996683	0	***
H11	0.762176962882025	0.0211572839656088	36.0243292154582	3.4808055253384e-284	***
H12	0.778691713483162	0.0211014188436822	36.9023390915869	4.23864319544202e-298	***
H13	0.878400388268269	0.0207891804617913	42.2527665235623	0	***
H14	0.89318986153619	0.0207450857528131	43.0554914151208	0	***
H15	0.97142209408965	0.0205183207177644	47.3441324683363	0	***
H16	1.07478861871081	0.0202459028477127	53.0867221281878	0	***
H17	1.09120223203761	0.0202070256538937	54.001130632867	0	***
H18	0.99998632466004	0.020441510670477	48.9193944997561	0	***
H19	0.894960516634524	0.0207398438927049	43.1517479718987	0	***
H20	0.756059503015825	0.0211744824903148	35.7061620448881	3.17192766705496e-279	***
H21	0.574458234571157	0.0218270338385048	26.3186578085458	1.17298495008545e-152	***
H22	0.47318951833638	0.0222337527351863	21.2824854163071	1.64962010673398e-100	***
H23	0.244939314604314	0.0232863688145762	10.518570609042	7.09416263117269e-26	***
P_BAR'	1.0021933854253	0.00358958167704655	279.195035965831	0	***
