# Supplementary material for: Predictive modeling of hourly probabilities for weather-related road accidents
Source: Copernicus journal article supplement (doi:10.5194/nhess-20-2857-2020), 2020-10-29
Supplement: Supplementary file 1 [file nhess-20-2857-2020-supplement.zip › nhess-20-2857-2020-supplement-title-page.pdf]

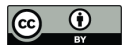

## *Supplement of*

# **Predictive modeling of hourly probabilities for weather-related road accidents**

**Nico Becker et al.**

*Correspondence to:* Nico Becker ([nico.becker@met.fu-berlin.de](mailto:nico.becker@met.fu-berlin.de))

- [nhess-20-2857-2020-supplement-title-page.pdf](#)
- [Description.pdf](#)
- [HOUR.csv](#)
- [NULL.csv](#)
- [RAD.csv](#)
- [RAD\\_INT.csv](#)

The copyright of individual parts of the supplement might differ from the CC BY 4.0 License.
