# Supplementary material for: Predictive modeling of hourly probabilities for weather-related road accidents
Source: Copernicus journal article supplement (doi:10.5194/nhess-20-2857-2020), 2020-10-29
Supplement: Supplementary file 1 [file nhess-20-2857-2020-supplement.zip › NULL.csv]

Parameter	Estimate	Std. Error	z value	Pr(>|z|)	Significance
Intercept	4.54774965076976e-10	0.0166503481271426	2.73132406364299e-08	0.999999978207187
P_BAR'	1.00000000010656	0.00358130362127506	279.227930903699	0	***
