# Supplementary material for: Predictive modeling of hourly probabilities for weather-related road accidents
Source: Copernicus journal article supplement (doi:10.5194/nhess-20-2857-2020), 2020-10-29
Supplement: Supplementary file 1 [file nhess-20-2857-2020-supplement.zip › RAD.csv]

Parameter	Estimate	Std. Error	z value	Pr(>|z|)	Significance
Intercept	-0.638006981485054	0.0250895188599643	-25.429223455661	1.19859438226553e-142	***
H1	-0.207390030080786	0.0262572231029692	-7.89839920495378	2.82508097557053e-15	***
H2	-0.290007305219603	0.0268092728728227	-10.8174252466799	2.8466216862014e-27	***
H3	-0.2368177033933	0.0263859850274335	-8.97513218275085	2.83011765357592e-19	***
H4	0.0179626786098553	0.0246732712283184	0.728021770750807	0.466600259505321
H5	0.727804242924658	0.0214750028618726	33.8907634893416	9.11312673410489e-252	***
H6	1.10951833861231	0.0203872286059128	54.4222248182632	0	***
H7	1.40634582924464	0.0197506308154313	71.2051094664708	0	***
H8	1.12129548413036	0.0202960460634216	55.2469914892046	0	***
H9	0.966729689795126	0.0207263781652827	46.6424805185899	0	***
H10	0.810236774345038	0.0212989651176785	38.0411334479593	0	***
H11	0.847345530700076	0.0213822837888647	39.6283923208124	0	***
H12	0.909858190225282	0.0213274674501193	42.6613329666666	0	***
H13	1.02511808206989	0.0210169325095456	48.7758183362058	0	***
H14	1.02362921757092	0.020971442142084	48.8106259281411	0	***
H15	1.06482867385253	0.02074371478603	51.3325932619188	0	***
H16	1.11752634167791	0.0204720183456617	54.5879904369434	0	***
H17	1.08820322486291	0.0204302393474725	53.2643404883818	0	***
H18	0.960770181513776	0.0206685451853159	46.4846544785533	0	***
H19	0.849622350139328	0.0209597877519163	40.5358279480502	0	***
H20	0.70708106300717	0.0213946831129332	33.0493823757424	1.58770859238152e-239	***
H21	0.531670055789982	0.0220434941499079	24.1191370194912	1.57459484621861e-128	***
H22	0.442712704438762	0.02245052056522	19.7194850405655	1.46714593397458e-86	***
H23	0.227036404195431	0.0234983839523452	9.66178800447986	4.3814892377541e-22	***
Pr_RAD^0.2	3.16847456181446	0.00789442774382365	401.355825226644	0	***
T_REA+	-1.97794055315094	0.00542851423106078	-364.361309367782	0	***
P_BAR'	1.02656843897588	0.00374705526917101	273.96671925872	0	***
