# Supplementary material for: Predictive modeling of hourly probabilities for weather-related road accidents
Source: Copernicus journal article supplement (doi:10.5194/nhess-20-2857-2020), 2020-10-29
Supplement: Supplementary file 1 [file nhess-20-2857-2020-supplement.zip › RAD_INT.csv]

Parameter	Estimate	Std. Error	z value	Pr(>|z|)	Significance
Intercept	-1.35192396084215	0.131253271797581	-10.3001162738791	7.0376185541391e-25	***
H1	-0.240750991005251	0.189617861216784	-1.26966409947008	0.204204306019907
H2	-0.0321461200075211	0.192799767226336	-0.166733188893238	0.867579990096532
H3	-0.351997256001179	0.190779218532067	-1.84505030846436	0.0650302207143545	.
H4	-0.182819608426555	0.178747092572205	-1.0227836760629	0.306410137847559
H5	0.231988630003471	0.155785245716365	1.48915662029926	0.136446130908619
H6	0.496997433197748	0.14792796748928	3.35972596415051	0.000780198192364303	***
H7	0.627893815908445	0.143283638632109	4.38217386090124	1.17500981413329e-05	***
H8	0.797843141791071	0.14715582731815	5.42175703355693	5.90160611247052e-08	***
H9	0.681779506679873	0.150481007407247	4.53066814494917	5.87974362229904e-06	***
H10	0.724984331899787	0.154201856535977	4.70152790754915	2.58221963113489e-06	***
H11	0.390042833908775	0.155532750591836	2.50778586776468	0.0121490265602912	**
H12	0.264644261199102	0.155528706065687	1.7015782352573	0.0888344603863827	.
H13	0.324261979223861	0.153521701269348	2.11215728162728	0.0346729611864178	**
H14	0.439344983176613	0.153344580178328	2.86508321758544	0.00416899667585155	**
H15	0.389945253084013	0.151674907437338	2.57092791202205	0.010142643708824	**
H16	0.410200115957516	0.149658897499385	2.74090029267523	0.00612710975981484	**
H17	0.358570097084499	0.149363002958146	2.4006620781786	0.0163654415390339	**
H18	0.495384502166927	0.150653939863283	3.28822799202254	0.00100820156746551	**
H19	0.326036634119921	0.15293687080842	2.13183800869275	0.0330201658299011	**
H20	0.136948911525114	0.156044565914439	0.877626918454855	0.38014621619507
H21	0.22819657535328	0.16034398246637	1.42316893869804	0.154687187600267
H22	0.403682184079722	0.162707605477697	2.48102836308445	0.0131003948499583	**
H23	0.0956316784487253	0.170318228851235	0.561488215875324	0.574464761433757
Pr_RAD^0.2	3.52047430213809	0.0788191756427121	44.6652007386683	0	***
T_REA+	-0.615677467792144	0.053309593786039	-11.5490932131878	7.46033918831302e-31	***
P_BAR'	0.85070000755128	0.0269777293665857	31.533417656897	3.0267618049758e-218	***
H1:Pr_RAD^0.2	0.04919903270092	0.0796702321452603	0.61753344224248	0.536882930116135
H2:Pr_RAD^0.2	-0.13770585867848	0.0814742451717458	-1.69017655073943	0.0909941831255529	.
H3:Pr_RAD^0.2	-0.131416808368248	0.0803358122283232	-1.63584340187845	0.101872365854104
H4:Pr_RAD^0.2	-0.163858952788956	0.0753876383848299	-2.1735520079898	0.029738795969278	**
H5:Pr_RAD^0.2	-0.37937052143285	0.0656501940845357	-5.77866564940153	7.52953882594047e-09	***
H6:Pr_RAD^0.2	-0.396848830501842	0.0623658253244263	-6.36324186262972	1.97539255980972e-10	***
H7:Pr_RAD^0.2	-0.330927017685148	0.0604612279988946	-5.47337572586515	4.41542561283363e-08	***
H8:Pr_RAD^0.2	-0.142203366551395	0.0625568710324772	-2.27318541040149	0.0230150091178004	**
H9:Pr_RAD^0.2	0.136428225641579	0.0640841473943035	2.12889195204782	0.0332632007839384	**
H10:Pr_RAD^0.2	0.139295824004762	0.0652278232544416	2.13552770972281	0.0327179292454813	**
H11:Pr_RAD^0.2	0.558012151159844	0.0660660660251073	8.44627483870132	3.00745202338011e-17	***
H12:Pr_RAD^0.2	0.79729229556591	0.0660669118425261	12.0679516164808	1.55968347175113e-33	***
H13:Pr_RAD^0.2	0.827543788381606	0.0650965855906273	12.712552906934	5.03629960377568e-37	***
H14:Pr_RAD^0.2	0.869798325727552	0.0650006330793093	13.381382373096	7.76888936390286e-41	***
H15:Pr_RAD^0.2	0.752831985049606	0.0644001895009495	11.6899032577925	1.43550034411031e-31	***
H16:Pr_RAD^0.2	0.730013990658736	0.0634102148619074	11.5125613790859	1.14040138351319e-30	***
H17:Pr_RAD^0.2	0.755737500588464	0.0632804408832145	11.9426712273259	7.09087296498037e-33	***
H18:Pr_RAD^0.2	0.540383016352838	0.0633491762182646	8.53022957222035	1.46057577952491e-17	***
H19:Pr_RAD^0.2	0.585807208495776	0.0646624652011741	9.05946296159985	1.31094391879564e-19	***
H20:Pr_RAD^0.2	0.486597837220361	0.0655716626906331	7.42085555335279	1.16366173281442e-13	***
H21:Pr_RAD^0.2	0.329782104870783	0.0675917453425176	4.879029283822	1.06609236185063e-06	***
H22:Pr_RAD^0.2	0.147392369947608	0.0685378157670529	2.15052622115311	0.0315136141845058	**
H23:Pr_RAD^0.2	0.183570254469509	0.071540712719184	2.56595506938924	0.0102892155193478	**
H1:T_REA+	-0.102345632137954	0.0553793494174363	-1.8480829625949	0.0645903420760448	.
H2:T_REA+	-0.166261210607107	0.0562832284859195	-2.95400983702812	0.003136740069315	**
H3:T_REA+	-0.111146536405737	0.0552613223426958	-2.01128984421466	0.0442948505880278	**
H4:T_REA+	-0.183326128038455	0.0517448645079613	-3.54288545890866	0.000395774561659005	***
H5:T_REA+	0.03656747047646	0.0451034342449861	0.810746921793989	0.417511021432651
H6:T_REA+	0.115229144633337	0.0429271962764337	2.68429235143401	0.00726835179272198	**
H7:T_REA+	0.192114546924054	0.0416815358693818	4.60910431722303	4.04407397238773e-06	***
H8:T_REA+	0.0494983603754658	0.0428518432314464	1.15510457993886	0.24804760294643
H9:T_REA+	-0.138154421215639	0.0438501453866307	-3.15060349281672	0.00162933519975691	**
H10:T_REA+	-0.0784165024979788	0.0449471875854989	-1.74463646582591	0.0810481690460045	.
H11:T_REA+	-0.0826395200680724	0.0455751722728171	-1.81325743704017	0.0697921247035132	.
H12:T_REA+	-0.126934426782001	0.0458296295684307	-2.76970222053548	0.00561075628374775	**
H13:T_REA+	-0.138834174630772	0.045479603506726	-3.05266897523061	0.00226815991318478	**
H14:T_REA+	-0.210776438696982	0.0456883036335035	-4.61335663472561	3.96217590855008e-06	***
H15:T_REA+	-0.244865547124372	0.0450409293509039	-5.43651187160634	5.43337207166767e-08	***
H16:T_REA+	-0.180017976659452	0.044457586978787	-4.04920709586304	5.13914532833448e-05	***
H17:T_REA+	-0.041369480832419	0.0444877599378851	-0.929907032635047	0.352419221455904
H18:T_REA+	0.0402381658135334	0.0449476529964813	0.895222845488361	0.37066797468508
H19:T_REA+	-0.0198558333290164	0.0453987932296627	-0.437364782552039	0.661846820370892
H20:T_REA+	0.0569065152360249	0.0462814196855692	1.22957583459283	0.218855983863239
H21:T_REA+	-0.0396262684150018	0.0472624316248246	-0.838430589639574	0.401788915397135
H22:T_REA+	-0.0396356252391499	0.0478636930840203	-0.82809375301595	0.407617407076683
H23:T_REA+	-0.0422918162810256	0.0499593338912328	-0.846524823031062	0.397260032113332
H1:P_BAR'	-0.0136201510633326	0.0389015396860776	-0.35011856017121	0.726249722375494
H2:P_BAR'	0.0207394043430539	0.0396594069527338	0.522937833330974	0.601017515452408
H3:P_BAR'	-0.0529680735469684	0.0391009409029326	-1.35464958959583	0.175529225967751
H4:P_BAR'	-0.0823461863066729	0.0366089077104577	-2.24934835417528	0.0244903416706745	**
H5:P_BAR'	-0.144402758240075	0.0318537755082277	-4.53330118443186	5.80689226056585e-06	***
H6:P_BAR'	-0.160886974315297	0.0302502241597523	-5.31853825167205	1.04604230301502e-07	***
H7:P_BAR'	-0.178947384382766	0.0293038869852201	-6.1066091495992	1.01770047496768e-09	***
H8:P_BAR'	-0.0785897820557494	0.0301375755290328	-2.60770087428036	0.00911525704389543	**
H9:P_BAR'	-0.06042236939903	0.0308296954068945	-1.95987565240484	0.0500103260494407	.
H10:P_BAR'	-0.0100003014043462	0.0316266438325125	-0.316198628514159	0.751851748675188
H11:P_BAR'	-0.0410747987813471	0.0318278636743699	-1.29052955616445	0.196866856615018
H12:P_BAR'	-0.0580136149947346	0.0317879350226179	-1.82501993141286	0.0679980216417031	.
H13:P_BAR'	-0.0673567447385858	0.0313411061874727	-2.14915020343184	0.0316224951973633	**
H14:P_BAR'	-0.0454974854755325	0.031303748398213	-1.45341972778345	0.146107252339443
H15:P_BAR'	-0.084944225789008	0.0309350557776439	-2.74588888410524	0.00603471988885182	**
H16:P_BAR'	-0.0840276704440478	0.0305279414174127	-2.75248400457554	0.00591450356585178	**
H17:P_BAR'	-0.0634725980154932	0.0304742516768668	-2.08282712529002	0.0372669841303928	**
H18:P_BAR'	-0.0235216187399343	0.030791058912013	-0.76391067962776	0.444920472716751
H19:P_BAR'	-0.0393512937422292	0.0312553689941709	-1.25902508940362	0.20802126979864
H20:P_BAR'	-0.0524779679837039	0.0318863261825885	-1.64578282500163	0.0998084795524032	.
H21:P_BAR'	-0.0295878182787674	0.0328119552953189	-0.901738954977441	0.36719555441136
H22:P_BAR'	0.00442741618084015	0.0333511472471527	0.132751540690048	0.894389879972808
H23:P_BAR'	-0.0113209852692462	0.0349037079655421	-0.324349071463197	0.745673772307643
Pr_RAD^0.2:T_REA+	-0.0917827903314464	0.0175913018383644	-5.21750983382481	1.8134459877389e-07	***
Pr_RAD^0.2:P_BAR'	0.123934532583135	0.0120675262021714	10.2700860563149	9.61188817593129e-25	***
T_REA+:P_BAR'	0.275122844650929	0.00817797230612355	33.641938900297	4.09034833284599e-248	***
